# Supplementary material
Source: publisher figshare collection journal article supplement (https://asha.figshare.com/ndownloader/files/17294942)
Supplement: Supplementary file 1 [file 17294942]

Supplemental Material S1. Item set information.

**PART 1: ITEM SETS.**

**Notes:**

- Identifying information is redacted and replaced with X (each X represents a syllable)
- Numbers following items in Massed sets indicate treatment phase (Massed subset 1 or 2)

**CAS 001**

| <b>DISTRIBUTED</b>           | <b>MASSED</b>                            | <b>CONTROL</b>             |
|------------------------------|------------------------------------------|----------------------------|
| I love cheeseburgers         | I'm hungry (1)                           | Let's have breakfast       |
| Exterminate                  | I know karate (1)                        | Tardis                     |
| I'm taking drum lessons      | Can I have the iPad please? (1)          | Let's do something else    |
| Do you want to play Xbox?    | What do you want to drink? (1)           | Are you ready to go home?  |
| Where is the bathroom?       | XX is my sister (1)                      | Who is the Doctor?         |
| Please don't do that         | Thank you very much (2)                  | XXX is my friend           |
| I play basketball            | We have eight cats (2)                   | I like Target              |
| XXX (last name)              | Minecraft (2)                            | XX X (hometown)            |
| Gingercat                    | My name is X (2)                         | Alfie is one of our dogs   |
| Mrs. XX is my speech teacher | Time and Relative Dimension in Space (2) | Let's watch YouTube videos |

**CAS 002**

| <b>DISTRIBUTED</b>       | <b>MASSED</b>               | <b>CONTROL</b>                 |
|--------------------------|-----------------------------|--------------------------------|
| I want a cereal bar      | breakfast (1)               | I like chocolate milk          |
| XXX is my speech teacher | My dad's name is XX (1)     | X is my brother                |
| XXX (friend's name)      | When are we going? (1)      | it's almost 6 o'clock          |
| I like playdough         | 5 minutes later (1)         | XXXX XXX Lane (street address) |
| I live in XXX            | When is the movie? (1)      | Where's the bathroom?          |
| What time is it?         | Minecraft (2)               | Do you want to play?           |
| memory                   | XX is my friend (2)         | I'm sorry                      |
| Talk to you later        | My name is XX XXX (2)       | kitchen                        |
| Beauty and the Beast     | Can you help me please? (2) | after 2 hours                  |
| What's your name?        | Have a nice day (2)         | Where are my shoes?            |

**CAS 003**

| <b>DISTRIBUTED</b>      | <b>MASSED</b>            | <b>CONTROL</b>       |
|-------------------------|--------------------------|----------------------|
| My name is XXX          | XX is my cousin (1)      | X is my twin brother |
| Spiderman               | Wolverine (1)            | Captain America      |
| Can you help me please? | Thank you (1)            | I'm hungry           |
| Batman                  | Excuse me (1)            | Iron Man             |
| Mrs. XX (SLP)           | Charlie is our dog (1)   | Paw Patrol           |
| How are you today?      | I wanna play outside (2) | Good morning mom     |
| See you later           | cereal (2)               | I love you           |
| pepperoni               | strawberry milk (2)      | chicken nuggets      |
| breakfast               | Mrs. X (teacher) (2)     | Burger King          |
| Where is the bathroom?  | Who is that? (2)         | What's for dinner?   |

### CAS 004

| <b>DISTRIBUTED</b>      | <b>MASSED</b>            | <b>CONTROL</b>       |
|-------------------------|--------------------------|----------------------|
| My name is X            | What's on TV? (1)        | XX is my cousin      |
| Spiderman               | superhero (1)            | Wolverine            |
| Can you help me please? | I'm thirsty (1)          | I wanna play outside |
| Polar Bear              | Batmobile (1)            | Paw Patrol           |
| Mrs. XX (SLP)           | Good morning dad (1)     | Charlie is our dog   |
| How are you today?      | I love you (2)           | Thank you            |
| See you later           | Mrs. S (2)               | Excuse me            |
| pepperoni               | chocolate milk (2)       | cheese-its           |
| Where are my shoes?     | cereal (2)               | Burger King          |
| Where is the bathroom?  | X is my twin brother (2) | Who is that?         |

### CAS 005

| <b>DISTRIBUTED</b>     | <b>MASSED</b>         | <b>CONTROL</b> |
|------------------------|-----------------------|----------------|
| XX XX (name)           | excuse me (1)         | Pepper (dog)   |
| thank you              | yesterday (1)         | hello          |
| teacher                | Mickey (1)            | towel          |
| doing                  | What's your name? (1) | tomorrow       |
| Disney World           | sister (1)            | Phanatic       |
| XX (friend)            | XXX (sister) (2)      | XX (friend)    |
| please                 | XX (friend) (2)       | see you later  |
| hamburger              | good morning (2)      | guacamole      |
| Where is the bathroom? | pizza (2)             | How are you?   |
| I'm tired              | I'm hungry (2)        | I'm thirsty    |

### CAS 008

| <b>DISTRIBUTED</b> | <b>MASSED</b>             | <b>CONTROL</b>           |
|--------------------|---------------------------|--------------------------|
| XX XXX (name)      | lollipops (1)             | XX is my cousin          |
| Petey the fish     | museum (1)                | Tony Box Turtle          |
| XX (friend)        | See you later (1)         | Train station            |
| Miss XX (SLP)      | I want my Teddy (1)       | Stewart (character)      |
| Amelia Bedelia     | Let's go (1)              | Sister X (family friend) |
| Excuse me          | Oreo (2)                  | No thank you             |
| Please stop        | Uncle XX (2)              | Juice                    |
| What's your name?  | breakfast (2)             | How are you?             |
| Play-doh           | Where's the bathroom? (2) | Yesterday                |
| I'm hungry         | Angry Birds (2)           | Cat in the Hat           |

## PART 2: MATCHING INFORMATION.

Descriptive statistics for item set matching for length and baseline accuracy (SD for baseline accuracy based on averages of item scores, not based on set scores per probe). IPC = Index of Phonetic Complexity (Jakielski, 2002, 2017); IPC was calculated by treating each target as a single word. Within each child, there were no differences between any item sets ( $ps > .05$ ).

| Participant | Set             | # syllables (SD)   | Baseline accuracy (SD) | IPC               |
|-------------|-----------------|--------------------|------------------------|-------------------|
| 001         | Distributed     | 5.10 (1.85)        | 0.10 (0.11)            | 12.0 (4.2)        |
|             | Massed          | 5.20 (2.25)        | 0.11 (0.11)            | 10.4 (3.6)        |
|             | <i>Massed 1</i> | <i>5.40 (1.52)</i> | <i>0.10 (0.14)</i>     | <i>10.0 (3.9)</i> |
|             | <i>Massed 2</i> | <i>5.00 (3.00)</i> | <i>0.12 (0.08)</i>     | <i>10.8 (3.6)</i> |
|             | Control         | 5.00 (1.76)        | 0.15 (0.23)            | 11.4 (4.4)        |
| 002         | Distributed     | 4.80 (1.75)        | 0.18 (0.21)            | 7.8 (4.2)         |
|             | Massed          | 4.70 (1.77)        | 0.27 (0.18)            | 10.1 (3.5)        |
|             | <i>Massed 1</i> | <i>4.60 (1.52)</i> | <i>0.27 (0.19)</i>     | <i>8.6 (1.1)</i>  |
|             | <i>Massed 2</i> | <i>4.80 (2.17)</i> | <i>0.27 (0.19)</i>     | <i>11.6 (4.5)</i> |
|             | Control         | 4.70 (1.64)        | 0.22 (0.22)            | 10.9 (5.1)        |
| 003         | Distributed     | 4.00 (1.33)        | 0.17 (0.24)            | 8.2 (3.8)         |
|             | Massed          | 3.80 (1.40)        | 0.15 (0.24)            | 9.0 (2.5)         |
|             | <i>Massed 1</i> | <i>3.80 (1.64)</i> | <i>0.10 (0.22)</i>     | <i>8.4 (2.4)</i>  |
|             | <i>Massed 2</i> | <i>3.80 (1.30)</i> | <i>0.20 (0.27)</i>     | <i>9.6 (2.7)</i>  |
|             | Control         | 3.90 (1.20)        | 0.10 (0.14)            | 7.9 (2.3)         |
| 004         | Distributed     | 4.10 (0.74)        | 0.20 (0.20)            | 7.9 (2.9)         |
|             | Massed          | 3.60 (0.97)        | 0.17 (0.31)            | 8.1 (3.7)         |
|             | <i>Massed 1</i> | <i>3.60 (0.55)</i> | <i>0.20 (0.36)</i>     | <i>7.2 (1.6)</i>  |
|             | <i>Massed 2</i> | <i>3.60 (1.34)</i> | <i>0.13 (0.30)</i>     | <i>9.0 (5.1)</i>  |
|             | Control         | 3.60 (1.51)        | 0.10 (0.18)            | 8.7 (2.2)         |
| 005         | Distributed     | 2.70 (1.16)        | 0.11 (0.23)            | 5.2 (2.7)         |
|             | Massed          | 2.70 (0.67)        | 0.11 (0.16)            | 5.4 (2.9)         |
|             | <i>Massed 1</i> | <i>2.60 (0.55)</i> | <i>0.06 (0.13)</i>     | <i>5.4 (3.0)</i>  |
|             | <i>Massed 2</i> | <i>2.80 (0.84)</i> | <i>0.16 (0.36)</i>     | <i>5.4 (3.1)</i>  |
|             | Control         | 2.70 (0.67)        | 0.12 (0.20)            | 3.7 (2.2)         |
| 008         | Distributed     | 3.30 (1.34)        | 0.05 (0.12)            | 7.1 (2.3)         |
|             | Massed          | 3.30 (0.95)        | 0.08 (0.12)            | 6.6 (3.4)         |
|             | <i>Massed 1</i> | <i>3.40 (1.14)</i> | <i>0.10 (0.16)</i>     | <i>5.0 (1.6)</i>  |
|             | <i>Massed 2</i> | <i>3.20 (0.84)</i> | <i>0.05 (0.07)</i>     | <i>8.2 (4.2)</i>  |
|             | Control         | 3.30 (1.42)        | 0.07 (0.17)            | 6.5 (2.5)         |

## References

- Jakielski, K. J. (2002). *The index of phonetic complexity: Preliminary findings*. Paper presented at the Annual Child Phonology Conference, Wichita, KS.
- Jakielski, K. J. (2017). *Building speech and quantifying complexity. The manual*. Pittsburgh, PA: Childhood Apraxia of Speech Association of North America.
